# Supplementary material for: Biohydrogen Production from Hydrolysates of Selected Tropical Biomass Wastes with Clostridium Butyricum
Source: PubMed Central journal article supplement (PMC4890049; doi:10.1038/srep27205), 2016-06-02
Supplement: srep27205-s1.pdf [file srep27205-s1.pdf]

## Supplementary Materials

### **Biohydrogen Production from Hydrolysates of Selected Tropical Biomass Wastes with *Clostridium Butyricum***

Dan Jiang<sup>1,3</sup>, Zhen Fang<sup>\*2,3,1</sup>, Siew-xian Chin<sup>3,4</sup>, Xiao-fei Tian<sup>3,5</sup>, Tong-chao Su<sup>1,3</sup>

<sup>1</sup> University of Science and Technology of China, School of Life Science, 443 Huangshan Road, Hefei, Anhui Province 230022, China

<sup>2</sup> Biomass Group, College of Engineering, Nanjing Agricultural University, 40 Dianjiangtai Road, Nanjing, Jiangsu 210031, China

<sup>3</sup> Chinese Academy of Sciences, Biomass Group, Key Laboratory of Tropical Plant Resources and Sustainable Use, Xishuangbanna Tropical Botanical Garden, 88 Xuefulu, Kunming, Yunnan Province 650223, China

<sup>4</sup> Department of Chemical and Process Engineering, Faculty of Engineering and Built Environment, Universiti Kebangsaan Malaysia, 43600 UKM, Bangi, Selangor, Malaysia

<sup>5</sup> Department of Chemical Engineering, University of New Brunswick, 3 Bailey Dr, Fredericton, New Brunswick, E3B 5A3, Canada

\*Author for correspondence, zhen.fang@mail.mcgill.ca

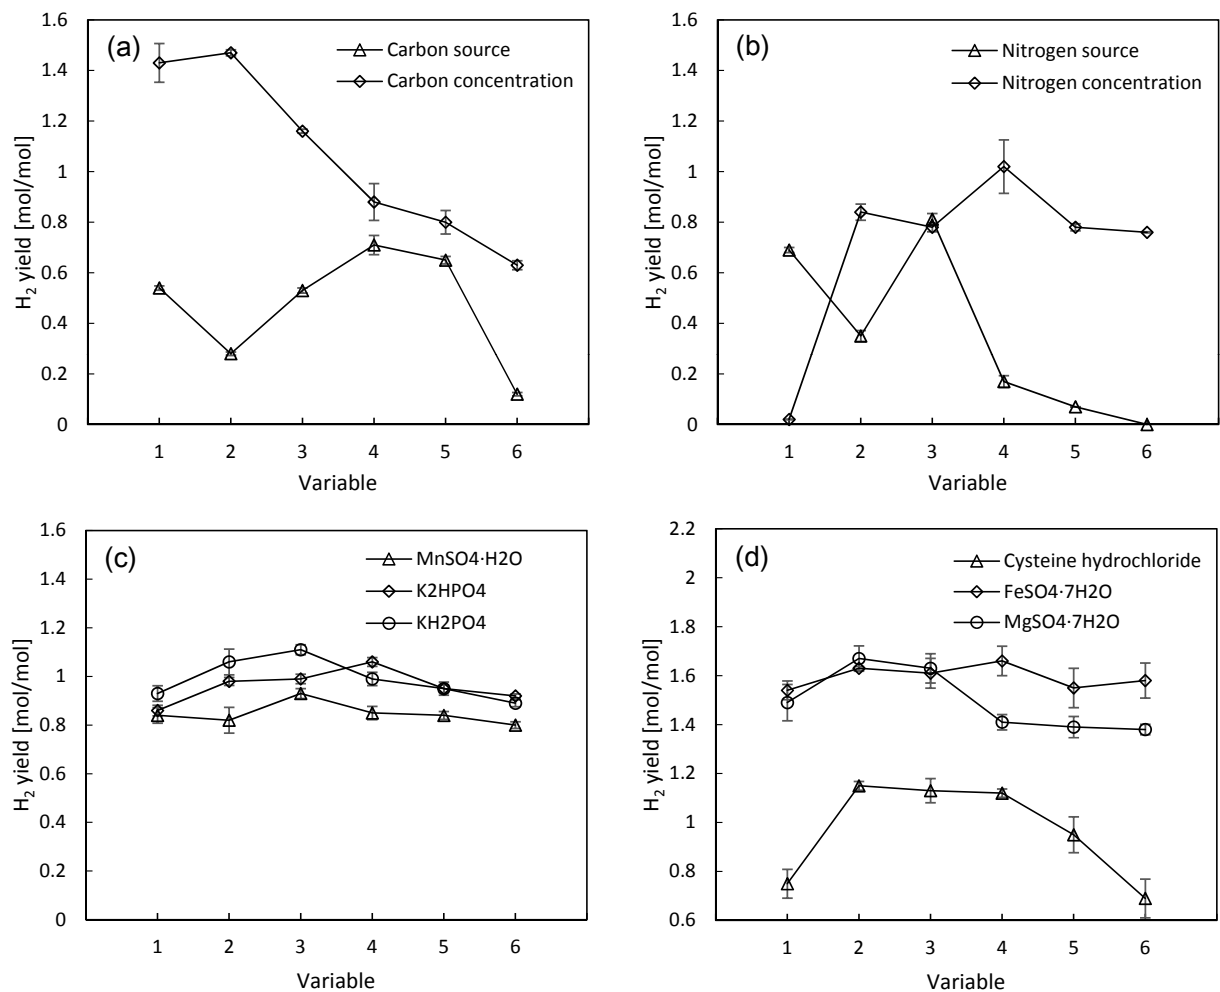

Figure S1. H<sub>2</sub> yield versus variable under the initial medium condition for 24 h bottle fermentation at 35 °C and 130 rpm shaking: (a) carbon sources (No.1-6: Xylose, Galactose, Fructose, Glucose, Mannose, Glycerol; 20g/L), carbon concentrations (No.1-6: 10, 15, 20, 25, 30, 35 g/L); (b) nitrogen sources (No.1-6: tryptone, peptone, yeast extract, urea, (NH<sub>4</sub>)<sub>2</sub>SO<sub>4</sub>, NH<sub>3</sub>·H<sub>2</sub>O; 10 g/L), nitrogen concentrations (No.1-6: 0, 1, 3, 5, 7, 9 g/L); (c) concentrations of MnSO<sub>4</sub>·7H<sub>2</sub>O (No.1-6: 0, 0.05, 0.1, 0.15, 0.2, 0.25 g/L), concentrations of K<sub>2</sub>HPO<sub>4</sub> and KH<sub>2</sub>PO<sub>4</sub> (No.1-6: 0, 1, 3, 5, 7, 9 g/L); (d) concentrations of cysteine hydrochloride and MgSO<sub>4</sub>·7H<sub>2</sub>O (No.1-6: 0, 0.05, 0.1, 0.15, 0.2, 0.25 g/L), concentrations of FeSO<sub>4</sub>·7H<sub>2</sub>O (No.1-6: 0, 0.1, 0.2, 0.3, 0.4, 0.5 g/L).

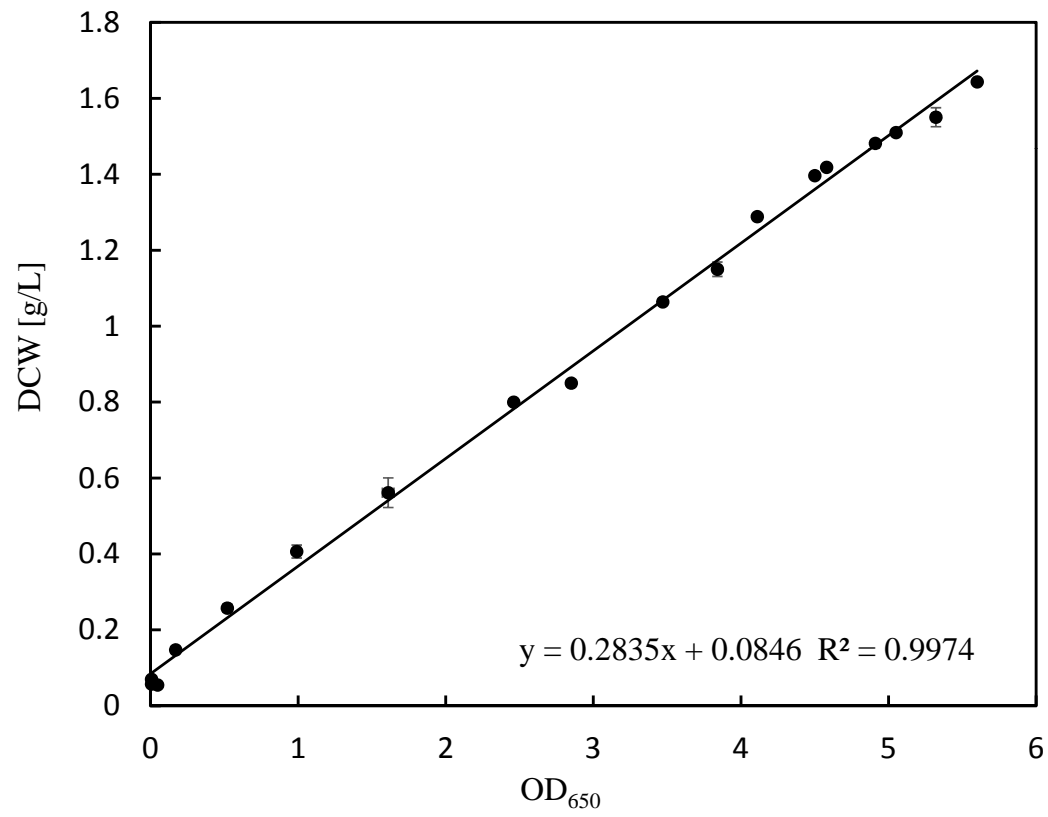

Figure S2. Regression curve between dry cell weight (DCW) and optical density (OD<sub>650</sub>).

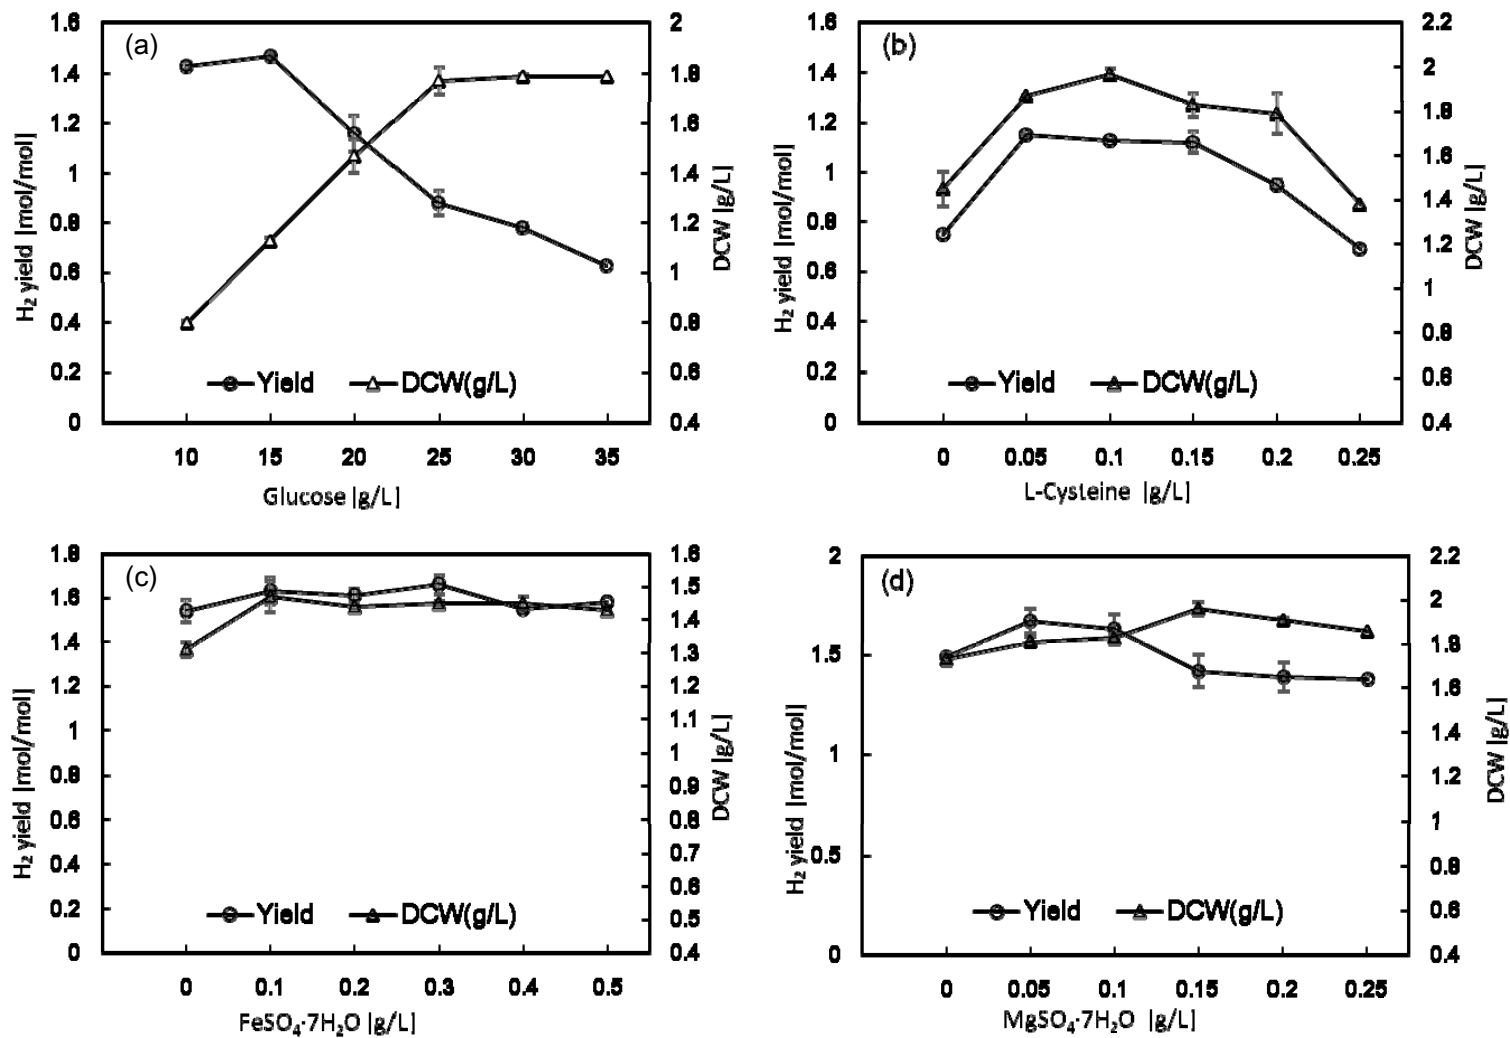

Figure S3. H<sub>2</sub> yield and dry cell weight (DCW) versus different concentration of (a) glucose, (b) L-cysteine, (c) FeSO<sub>4</sub>·7H<sub>2</sub>O, and (d) MgSO<sub>4</sub>·7H<sub>2</sub>O (24 h bottle fermentation at 35 °C and 130 rpm shaking).
